# Supplementary material
Source: PubMed Central journal article supplement (PMC3823288)
Supplement: jcmm0016-0237-SD1.pdf [file jcmm0016-0237-SD1.pdf]

**Supplementary table S1. Tyrosine kinase gene fusions in cancer.**

| 5' PARTNER      | 3' KINASE  | DIAGNOSIS                              | OLIGO-MERIZATION   | INHIBITORY DOMAIN DELETION | OTHER DOMAINS | REF   |
|-----------------|------------|----------------------------------------|--------------------|----------------------------|---------------|-------|
| BCR             | ABL1       | CML<br>ALL                             | CC #               | MYR                        | Y177 #        | 1     |
| NUP214          | ABL1       | T-ALL                                  | Via nuclear pore # | MYR                        |               | 2     |
| ETV6            | ABL1       | MPN<br>AML<br>B-ALL                    | PNT                | MYR                        |               | 3,4   |
| SFPQ            | ABL1       | B-ALL                                  | CC                 | MYR , SH3                  |               | 5,6   |
| ZMIZ1           | ABL1       | B-ALL*                                 | Pro                | MYR                        |               | 7     |
| RCSD1           | ABL1       | B-ALL*                                 | ?                  | MYR , SH3                  |               | 8     |
| EML1            | ABL1       | T-ALL*                                 | CC #               | MYR                        |               | 9     |
| ETV6 / TEL      | ARG / ABL2 | AML                                    | PNT                | MYR                        |               | 10,11 |
| NPM1            | ALK        | ALCL<br>DLBCL                          | New domain         |                            |               | 12-14 |
| CLTC / clathrin | ALK        | DLBCL<br>IMT                           | Via clathrin?      |                            |               | 13,15 |
| TFG             | ALK        | ALCL<br>NSCLC                          | CC                 |                            |               | 13,16 |
| TPM3            | ALK        | ALCL<br>IMT                            | CC                 |                            |               | 13    |
| TPM4            | ALK        | ALCL<br>IMT<br>Squamous cell carcinoma | CC                 |                            |               | 17    |
| ATIC            | ALK        | ALCL                                   | New domain         |                            |               | 13    |
| MYH9            | ALK        | ALCL*                                  |                    |                            |               | 18    |
| ALO17           | ALK        | ALCL*                                  | CC                 |                            |               | 19    |
| CARS            | ALK        | IMT                                    |                    |                            |               | 13    |
| RANBP2          | ALK        | IMT                                    | CC                 |                            |               | 13    |
| SEC31A          | ALK        | IMT<br>DLBCL*                          |                    |                            |               | 13,14 |
| EML4            | ALK        | NSCLC                                  | CC                 |                            |               | 13    |

| 5' PARTNER                                    | 3' KINASE | DIAGNOSIS                                   | OLIGO-MERIZATION         | INHIBITORY DOMAIN DELETION | OTHER DOMAINS | REF |
|-----------------------------------------------|-----------|---------------------------------------------|--------------------------|----------------------------|---------------|-----|
| KIF5B                                         | ALK       | Lung adenocarcinoma                         |                          |                            |               | 20  |
| Moesin / MSN                                  | ALK       | ALCL*                                       | CC<br>Via membrane?      |                            |               | 21  |
| SQSTM1                                        | ALK       | DLBCL*                                      | PB1                      |                            |               | 22  |
| ZNF198 / ZMYM2                                | FGFR1     | 8p11 MPN                                    | New domain #             |                            |               | 23  |
| FGFR1OP / FOP                                 | FGFR1     | 8p11 MPN                                    | LisH<br>Via centrosomes? |                            |               | 24  |
| CEP110 / CEP1                                 | FGFR1     | 8p11 MPN                                    | CC                       |                            |               | 25  |
| BCR                                           | FGFR1     | 8p11 MPN                                    | CC                       |                            |               | 26  |
| LRRFIP1                                       | FGFR1     | 8p11 MPN*                                   | CC                       |                            |               | 27  |
| FGFR1OP2                                      | FGFR1     | 8p11 MPN*                                   | CC                       |                            |               | 28  |
| TRIM24 / TIF1                                 | FGFR1     | 8p11 MPN*                                   | CC                       |                            |               | 29  |
| MYO18A                                        | FGFR1     | 8p11 MPN*                                   | CC                       |                            |               | 30  |
| CUX1                                          | FGFR1     | 8p11 MPN*                                   | CC                       |                            |               | 31  |
| CPSF6                                         | FGFR1     | 8p11 MPN*                                   |                          |                            |               | 6   |
| HERV-K<br>Human endogenous<br>retrovirus gene | FGFR1     | 8p11 MPN*                                   |                          |                            |               | 32  |
| IGH enhancer                                  | FGFR3     | Multiple myeloma                            | No protein fusion!       |                            |               | 33  |
| ETV6 / TEL                                    | FGFR3     | AML after T lymphoma*                       | PNT                      |                            |               | 31  |
| SPTBN1                                        | FLT3      | MPN*                                        | CC                       | JM                         |               | 34  |
| ETV6 / TEL                                    | FLT3      | MPN*                                        | PNT                      | JM                         |               | 35  |
| ETV6 / TEL                                    | FRK       | AML                                         | PNT                      | SH3, SH2                   |               | 36  |
| ETV6                                          | HCK       | <i>Retroviral insertion screen in Ba/F3</i> | PNT                      |                            |               | 37  |
| ETV6                                          | JAK1      | <i>Artificial construct in Ba/F3</i>        | PNT                      | JH2                        |               | 38  |
| ETV6 / TEL                                    | JAK2      | ALL                                         | PNT #                    | JH2                        |               | 39  |

| 5' PARTNER                       | 3' KINASE        | DIAGNOSIS                                      | OLIGO-MERIZATION | INHIBITORY DOMAIN DELETION | OTHER DOMAINS | REF       |
|----------------------------------|------------------|------------------------------------------------|------------------|----------------------------|---------------|-----------|
| PCMI                             | JAK2             | MPN<br>AML<br>ALL                              | CC               | -                          |               | 40-42     |
| BCR                              | JAK2             | MPN<br>AML                                     | CC               | JH2 (2/3)                  |               | 43-45     |
| SEC31A                           | JAK2             | Hodgkin lymphoma                               |                  | JH2                        |               | 46        |
| SSBP2<br><i>Tumor suppressor</i> | JAK2             | B-ALL*                                         | LisH             | -                          |               | 47        |
| STRN3                            | JAK2             |                                                | CC               |                            |               | Ref in 46 |
| PAX5                             | JAK2             | ALL                                            |                  | JH2                        |               | 48        |
| ETV6                             | JAK3             | <i>Artificial construct<br/>in Ba/F3</i>       | PNT              | JH2                        |               | 38        |
| ETV6                             | LCK              | <i>Retroviral inserion<br/>screen in Ba/F3</i> | PNT              |                            |               | 37        |
| ETV6 or EML1                     | MST1R / RON      | <i>Retroviral inserion<br/>screen in Ba/F3</i> | PNT or CC        |                            |               | 37        |
| EML1                             | MERTK /<br>c-MER | <i>Retroviral inserion<br/>screen in Ba/F3</i> | CC               |                            |               | 37        |
| TPR                              | MET              | <i>Cell line*</i>                              | CC #             | CBL binding<br>site #      |               | 49        |
| BCR                              | PDGFRA           | MPN                                            | CC               | JM                         |               | 50, 51    |
| FIP1L1                           | PDGFRA           | CEL/SM                                         | -                | JM #                       |               | 52, 53    |
| ETV6 / TEL                       | PDGFRA           | CEL                                            | PNT #            | ?                          |               | 54        |
| STRIATIN                         | PDGFRA           | CEL                                            | CC               | JM                         |               | 54        |
| CDK5RAP2                         | PDGFRA           | CEL*                                           | CC               | JM                         |               | 55        |
| KIF5B                            | PDGFRA           | Hypereosinophilia*                             | CC               | JM                         |               | 56        |
| RARA                             | PDGFRA           | JMML*                                          |                  | JM                         |               | 57        |
| KDR / VERGRII                    | PDGFRA           | Glioblastoma*                                  |                  | -                          | TM            | 58        |
| ETV6 / TEL                       | PDGFRB           | CMML                                           | PNT #            |                            | TM #          | 59        |
| CEV14 / TRIP11                   | PDGFRB           | AML                                            | CC               |                            | TM            | 60        |
| RABAPTIN5                        | PDGFRB           | CMML                                           | CC               |                            | TM            | 61        |

| 5' PARTNER                 | 3' KINASE | DIAGNOSIS                      | OLIGO-MERIZATION          | INHIBITORY DOMAIN DELETION | OTHER DOMAINS | REF       |
|----------------------------|-----------|--------------------------------|---------------------------|----------------------------|---------------|-----------|
| CCDC6 / H4                 | PDGFRB    | MDS*                           | CC                        |                            | TM            | 62        |
| PDE4DIP / myomegalin       | PDGFRB    | MDS*                           | CC <sup>#</sup>           |                            | TM            | 63        |
| TP53BP1                    | PDGFRB    | MPN                            |                           |                            | TM            | 64        |
| NIN                        | PDGFRB    | MPN*                           | CC                        | JM                         |               | 65        |
| HCMOGT-1 / CYTSB           | PDGFRB    | JMML*                          | CC                        |                            | TM            | 66        |
| HIP1                       | PDGFRB    | CMML                           | (CC), Talin <sup>#</sup>  |                            | TM            | 67        |
| KIAA1509 / CCDC88C         | PDGFRB    | MPN*                           | CC                        |                            | TM            | 68        |
| TROPOMYOSIN TPM3           | PDGFRB    | CEL*                           | CC                        |                            | TM            | 69        |
| NDE1                       | PDGFRB    | CMML*                          | CC                        |                            | TM            | 70        |
| GIT2                       | PDGFRB    | MPN*                           | ANK                       |                            | TM            | 71        |
| GPIAP1 / CAPRIN1           | PDGFRB    | CEL*                           | CC                        |                            | TM            | 71        |
| PRKG2                      | PDGFRB    | MPN                            | CC <sup>#</sup>           | JM <sup>#</sup>            |               | 71, 72    |
| Myosine / MYO18A           | PDGFRB    | MPN*                           | CC                        |                            | TM            | 73        |
| SART3                      | PDGFRB    | MPN*                           | CC                        |                            | TM            | 74        |
| ERC1                       | PDGFRB    | AML*                           | CC                        |                            | TM            | 75        |
| SPTBN1                     | PDGFRB    | MPN*                           | Breakpoint not determined |                            |               | 72        |
| WDR48                      | PDGFRB    | MPN*                           |                           |                            | TM            | 76        |
| GOLGA4                     | PDGFRB    | MPN*                           | CC                        |                            | TM            | 76        |
| BIN2                       | PDGFRB    | MPN*                           | CC                        | JM                         |               | 76        |
| KANK1<br>Tumor suppressor? | PDGFRB    | Thrombocythemia*               | CC & KOD <sup>#</sup>     | -                          | (IG5), TM     | 77        |
| NCOA4 / ELE1               | RET       | Papillary thyroid carcinomas   |                           | JM                         |               | Ref in 78 |
| KTN1                       | RET       | Papillary thyroid carcinomas * | CC                        | JM                         |               | 78,79     |

| 5' PARTNER                  | 3' KINASE    | DIAGNOSIS                                                                  | OLIGO-MERIZATION   | INHIBITORY DOMAIN DELETION | OTHER DOMAINS | REF       |
|-----------------------------|--------------|----------------------------------------------------------------------------|--------------------|----------------------------|---------------|-----------|
| PRKAR1A<br>Tumor suppressor | RET          | Papillary thyroid carcinomas *                                             |                    | JM                         |               | Ref in 78 |
| H4 / CCDC6                  | RET          | Papillary thyroid carcinomas                                               | CC #               | JM                         |               | 79        |
| TRIM24 / HTIF1              | RET          | Papillary thyroid carcinomas                                               | CC                 | JM                         |               | 79        |
| TRIM33 / RFG7               | RET          | Papillary thyroid carcinomas *                                             | CC                 | JM                         |               | 79        |
| RFP / TRIM27                | RET          | Papillary thyroid carcinomas                                               | CC                 | JM                         |               | Ref in 78 |
| PCM1 / MBD1                 | RET          | Papillary thyroid carcinomas *                                             | CC                 | JM                         |               | 79        |
| GOLGA5 / RFG5               | RET          | Papillary thyroid carcinomas *                                             | CC                 | JM                         |               | 79        |
| HOOK3                       | RET          | Papillary thyroid carcinomas *                                             | CC                 | JM                         |               | 80        |
| ELKS                        | RET          | Papillary thyroid carcinomas                                               | CC                 | JM                         |               | Ref in 78 |
| ERC1                        | RET          | Papillary thyroid carcinomas                                               | CC                 | JM                         |               | 78,79     |
| RFG8                        | RET          | Papillary thyroid carcinomas                                               | Data not available |                            |               | 81        |
| FIG                         | ROS          | <i>Glioblastoma cell line*</i>                                             | CC #               |                            |               | 82        |
| ITK                         | SYK          | Peripheral T-cell lymphoma                                                 |                    | Inter SH2 domain           | PH #          | 83        |
| ETV6 / TEL                  | SYK          | MDS*                                                                       | PNT #              | Inter SH2 domain           |               | 84        |
| ETV6 or EML1                | TNK1         | <i>Retroviral insertion screen in Ba/F3</i>                                | PNT or CC          |                            |               | 37        |
| Tropomyosin / TPM3          | TRKA / NTRK1 | Colon carcinoma*<br>Papillary thyroid carcinomas                           | CC                 |                            | TM            | 85,86     |
| TPR                         | TRKA / NTRK1 | Papillary thyroid carcinomas                                               | CC                 |                            | TM            | 86        |
| TFG                         | TRKA / NTRK1 | Papillary thyroid carcinomas                                               | CC                 |                            | TM            | 86        |
| ETV6 / TEL                  | TRKC / NTRK3 | AML*<br>Fibrosarcoma<br>Mesoblastic nephroma<br>Secretory breast carcinoma | PNT #              |                            |               | 87        |
| ETV6                        | TYK2         | <i>Artificial construct in Ba/F3</i>                                       | PNT                | JH2                        |               | 38        |

Fusions are listed according to the TK gene names in the alphabetic order.

Keys: \* single case; #, confirmed experimentally; (domain): present but not important.

**Abbreviations:** ALCL, anaplastic large cell lymphoma; ALL, acute lymphoblastic leukemia; AML, acute myeloid leukemia; CC, coiled coil domain; CEL, chronic eosinophilic leukemia; CMML, chronic myelomonocytic leukemia; DLBCL, Diffuse large B-cell lymphoma; IMF, Inflammatory myofibroblastic tumor; JM, intracellular juxtamembrane domain; JMML, juvenile myelomonocytic leukemia; MDS, myelodysplastic syndrome; MPN, myeloproliferative disorder; NSCLC, non-small cell lung carcinoma; PNT, pointed domain (also called SAM); SH2/SH3, Src-homology domain 2/3; TM, transmembrane domain.

## References

1. Smith KM, Yacobi R, Van Etten RA. Autoinhibition of Bcr-Abl through its SH3 domain. *Mol Cell.* 2003;12:27-37.
2. De Keersmaecker K, Rocnik JL, Bernad R, et al. Kinase activation and transformation by NUP214-ABL1 is dependent on the context of the nuclear pore. *Mol Cell.* 2008;31:134-142.
3. Janssen JW, Ridge SA, Papadopoulos P, et al. The fusion of TEL and ABL in human acute lymphoblastic leukaemia is a rare event. *Br J Haematol.* 1995;90:222-224.
4. Papadopoulos P, Ridge SA, Boucher CA, Stocking C, Wiedemann LM. The novel activation of ABL by fusion to an ets-related gene, TEL. *Cancer Res.* 1995;55:34-38.
5. Duhoux FP, Auger N, De Wilde S, et al. The t(1;9)(p34;q34) fusing ABL1 with SFPQ, a pre-mRNA processing gene, is recurrent in acute lymphoblastic leukemias. *Leuk Res.* 2011.
6. Hidalgo-Curtis C, Chase A, Drachenberg M, et al. The t(1;9)(p34;q34) and t(8;12)(p11;q15) fuse pre-mRNA processing proteins SFPQ (PSF) and CPSF6 to ABL and FGFR1. *Genes Chromosomes Cancer.* 2008;47:379-385.
7. Soler G, Radford-Weiss I, Ben-Abdelali R, et al. Fusion of ZMIZ1 to ABL1 in a B-cell acute lymphoblastic leukaemia with a t(9;10)(q34;q22.3) translocation. *Leukemia.* 2008;22:1278-1280.
8. Mustjoki S, Hernesniemi S, Rauhala A, et al. A novel dasatinib-sensitive RCSD1-ABL1 fusion transcript in chemotherapy-refractory adult pre-B lymphoblastic leukemia with t(1;9)(q24;q34). *Haematologica.* 2009;94:1469-1471.
9. De Keersmaecker K, Graux C, Odero MD, et al. Fusion of EML1 to ABL1 in T-cell acute lymphoblastic leukemia with cryptic t(9;14)(q34;q32). *Blood.* 2005;105:4849-4852.
10. Cazzaniga G, Tosi S, Aloisi A, et al. The tyrosine kinase abl-related gene ARG is fused to ETV6 in an AML-M4Eo patient with a t(1;12)(q25;p13): molecular cloning of both reciprocal transcripts. *Blood.* 1999;94:4370-4373.
11. Iijima Y, Ito T, Oikawa T, et al. A new ETV6/TEL partner gene, ARG (ABL-related gene or ABL2), identified in an AML-M3 cell line with a t(1;12)(q25;p13) translocation. *Blood.* 2000;95:2126-2131.
12. Morris SW, Kirstein MN, Valentine MB, et al. Fusion of a kinase gene, ALK, to a nucleolar protein gene, NPM, in non-Hodgkin's lymphoma. *Science.* 1994;263:1281-1284.
13. Palmer RH, Vernersson E, Grabbe C, Hallberg B. Anaplastic lymphoma kinase: signalling in development and disease. *Biochem J.* 2009;420:345-361.
14. Van Roosbroeck K, Cools J, Dierickx D, et al. ALK-positive large B-cell lymphomas with cryptic SEC31A-ALK and NPM1-ALK fusions. *Haematologica.* 95:509-513.
15. Touriol C, Greenland C, Lamant L, et al. Further demonstration of the diversity of chromosomal changes involving 2p23 in ALK-positive lymphoma: 2 cases expressing ALK kinase fused to CLTCL (clathrin chain polypeptide-like). *Blood.* 2000;95:3204-3207.
16. Hernandez L, Bea S, Bellosillo B, et al. Diversity of genomic breakpoints in TFG-ALK translocations in anaplastic large cell lymphomas: identification of a new TFG-ALK(XL) chimeric gene with transforming activity. *Am J Pathol.* 2002;160:1487-1494.
17. Meech SJ, McGavran L, Odom LF, et al. Unusual childhood extramedullary hematologic malignancy with natural killer cell properties that contains tropomyosin 4--anaplastic lymphoma kinase gene fusion. *Blood.* 2001;98:1209-1216.
18. Lamant L, Gascoyne RD, Duplantier MM, et al. Non-muscle myosin heavy chain (MYH9): a new partner fused to ALK in anaplastic large cell lymphoma. *Genes Chromosomes Cancer.* 2003;37:427-432.

19. Cools J, Wlodarska I, Somers R, et al. Identification of novel fusion partners of ALK, the anaplastic lymphoma kinase, in anaplastic large-cell lymphoma and inflammatory myofibroblastic tumor. *Genes Chromosomes Cancer*. 2002;34:354-362.
20. Takeuchi K, Choi YL, Togashi Y, et al. KIF5B-ALK, a novel fusion oncokine identified by an immunohistochemistry-based diagnostic system for ALK-positive lung cancer. *Clin Cancer Res*. 2009;15:3143-3149.
21. Tort F, Pinyol M, Pulford K, et al. Molecular characterization of a new ALK translocation involving moesin (MSN-ALK) in anaplastic large cell lymphoma. *Lab Invest*. 2001;81:419-426.
22. Takeuchi K, Soda M, Togashi Y, et al. Identification of a novel fusion, SQSTM1-ALK, in ALK-positive large B-cell lymphoma. *Haematologica*. 2011;96:464-467.
23. Xiao S, Nalabolu SR, Aster JC, et al. FGFR1 is fused with a novel zinc-finger gene, ZNF198, in the t(8;13) leukaemia/lymphoma syndrome. *Nat Genet*. 1998;18:84-87.
24. Popovici C, Zhang B, Gregoire MJ, et al. The t(6;8)(q27;p11) translocation in a stem cell myeloproliferative disorder fuses a novel gene, FOP, to fibroblast growth factor receptor 1. *Blood*. 1999;93:1381-1389.
25. Guasch G, Mack GJ, Popovici C, et al. FGFR1 is fused to the centrosome-associated protein CEP110 in the 8p12 stem cell myeloproliferative disorder with t(8;9)(p12;q33). *Blood*. 2000;95:1788-1796.
26. Demiroglu A, Steer EJ, Heath C, et al. The t(8;22) in chronic myeloid leukemia fuses BCR to FGFR1: transforming activity and specific inhibition of FGFR1 fusion proteins. *Blood*. 2001;98:3778-3783.
27. Soler G, Nusbaum S, Varet B, et al. LRRFIP1, a new FGFR1 partner gene associated with 8p11 myeloproliferative syndrome. *Leukemia*. 2009;23:1359-1361.
28. Grand EK, Grand FH, Chase AJ, et al. Identification of a novel gene, FGFR1OP2, fused to FGFR1 in 8p11 myeloproliferative syndrome. *Genes Chromosomes Cancer*. 2004;40:78-83.
29. Belloni E, Trubia M, Gasparini P, et al. 8p11 myeloproliferative syndrome with a novel t(7;8) translocation leading to fusion of the FGFR1 and TIF1 genes. *Genes Chromosomes Cancer*. 2005;42:320-325.
30. Walz C, Chase A, Schoch C, et al. The t(8;17)(p11;q23) in the 8p11 myeloproliferative syndrome fuses MYO18A to FGFR1. *Leukemia*. 2005;19:1005-1009.
31. Wasag B, Lierman E, Meeus P, Cools J, Vandenberghe P. The kinase inhibitor TKI258 is active against the novel CUX1-FGFR1 fusion detected in a patient with T-lymphoblastic leukemia/lymphoma and t(7;8)(q22;p11). *Haematologica*.
32. Guasch G, Popovici C, Mugneret F, et al. Endogenous retroviral sequence is fused to FGFR1 kinase in the 8p12 stem-cell myeloproliferative disorder with t(8;19)(p12;q13.3). *Blood*. 2003;101:286-288.
33. Chesi M, Nardini E, Brents LA, et al. Frequent translocation t(4;14)(p16.3;q32.3) in multiple myeloma is associated with increased expression and activating mutations of fibroblast growth factor receptor 3. *Nat Genet*. 1997;16:260-264.
34. Grand FH, Iqbal S, Zhang L, Russell NH, Chase A, Cross NC. A constitutively active SPTBN1-FLT3 fusion in atypical chronic myeloid leukemia is sensitive to tyrosine kinase inhibitors and immunotherapy. *Exp Hematol*. 2007;35:1723-1727.
35. Baldwin BR, Li L, Tse KF, et al. Transgenic mice expressing Tel-FLT3, a constitutively activated form of FLT3, develop myeloproliferative disease. *Leukemia*. 2007;21:764-771.
36. Hosoya N, Qiao Y, Hangaishi A, et al. Identification of a SRC-like tyrosine kinase gene, FRK, fused with ETV6 in a patient with acute myelogenous leukemia carrying a t(6;12)(q21;p13) translocation. *Genes Chromosomes Cancer*. 2005;42:269-279.
37. Lierman E, Van Miegroet H, Beullens E, Cools J. Identification of protein tyrosine kinases with oncogenic potential using a retroviral insertion mutagenesis screen. *Haematologica*. 2009;94:1440-1444.
38. Lacronique V, Boureux A, Monni R, et al. Transforming properties of chimeric TEL-JAK proteins in Ba/F3 cells. *Blood*. 2000;95:2076-2083.
39. Lacronique V, Boureux A, Valle VD, et al. A TEL-JAK2 fusion protein with constitutive kinase activity in human leukemia. *Science*. 1997;278:1309-1312.
40. Hoeller S, Walz C, Reiter A, Dirnhofer S, Tzankov A. PCM1-JAK2-fusion: a potential treatment target in myelodysplastic-myeloproliferative and other hemato-lymphoid neoplasms. *Expert Opin Ther Targets*;15:53-62.
41. Murati A, Gelsi-Boyer V, Adelaide J, et al. PCM1-JAK2 fusion in myeloproliferative disorders and acute erythroid leukemia with t(8;9) translocation. *Leukemia*. 2005;19:1692-1696.

42. Reiter A, Walz C, Watmore A, et al. The t(8;9)(p22;p24) is a recurrent abnormality in chronic and acute leukemia that fuses PCM1 to JAK2. *Cancer Res.* 2005;65:2662-2667.
43. Lane SW, Fairbairn DJ, McCarthy C, Nandini A, Perry-Keene J, Kennedy GA. Leukaemia cutis in atypical chronic myeloid leukaemia with a t(9;22)(p24;q11.2) leading to BCR-JAK2 fusion. *Br J Haematol.* 2008;142:503.
44. Cirmena G, Aliano S, Fugazza G, et al. A BCR-JAK2 fusion gene as the result of a t(9;22)(p24;q11) in a patient with acute myeloid leukemia. *Cancer Genet Cytogenet.* 2008;183:105-108.
45. Griesinger F, Hennig H, Hillmer F, et al. A BCR-JAK2 fusion gene as the result of a t(9;22)(p24;q11.2) translocation in a patient with a clinically typical chronic myeloid leukemia. *Genes Chromosomes Cancer.* 2005;44:329-333.
46. Van Roosbroeck K, Cox L, Tousseyn T, et al. JAK2 rearrangements, including the novel SEC31A-JAK2 fusion, are recurrent in classical Hodgkin lymphoma. *Blood.* 2011.
47. Poitras JL, Dal Cin P, Aster JC, Deangelo DJ, Morton CC. Novel SSBP2-JAK2 fusion gene resulting from a t(5;9)(q14.1;p24.1) in pre-B acute lymphocytic leukemia. *Genes Chromosomes Cancer.* 2008;47:884-889.
48. Nebral K, Denk D, Attarbaschi A, et al. Incidence and diversity of PAX5 fusion genes in childhood acute lymphoblastic leukemia. *Leukemia.* 2009;23:134-143.
49. Mak HH, Peschard P, Lin T, Naujokas MA, Zuo D, Park M. Oncogenic activation of the Met receptor tyrosine kinase fusion protein, Tpr-Met, involves exclusion from the endocytic degradative pathway. *Oncogene.* 2007;26:7213-7221.
50. Baxter EJ, Hochhaus A, Bolufer P, et al. The t(4;22)(q12;q11) in atypical chronic myeloid leukaemia fuses BCR to PDGFRA. *Hum Mol Genet.* 2002;11:1391-1397.
51. Safley AM, Sebastian S, Collins TS, et al. Molecular and cytogenetic characterization of a novel translocation t(4;22) involving the breakpoint cluster region and platelet-derived growth factor receptor-alpha genes in a patient with atypical chronic myeloid leukemia. *Genes Chromosomes Cancer.* 2004;40:44-50.
52. Cools J, DeAngelo DJ, Gotlib J, et al. A tyrosine kinase created by fusion of the PDGFRA and FIP1L1 genes as a therapeutic target of imatinib in idiopathic hypereosinophilic syndrome. *N Engl J Med.* 2003;348:1201-1214.
53. Pardanani A, Ketterling RP, Brockman SR, et al. CHIC2 deletion, a surrogate for FIP1L1-PDGFR A fusion, occurs in systemic mastocytosis associated with eosinophilia and predicts response to imatinib mesylate therapy. *Blood.* 2003;102:3093-3096.
54. Curtis CE, Grand FH, Musto P, et al. Two novel imatinib-responsive PDGFRA fusion genes in chronic eosinophilic leukaemia. *Br J Haematol.* 2007;138:77-81.
55. Walz C, Curtis C, Schnittger S, et al. Transient response to imatinib in a chronic eosinophilic leukemia associated with ins(9;4)(q33;q12q25) and a CDK5RAP2-PDGFR A fusion gene. *Genes Chromosomes Cancer.* 2006;45:950-956.
56. Score J, Curtis C, Waghorn K, et al. Identification of a novel imatinib responsive KIF5B-PDGFR A fusion gene following screening for PDGFRA overexpression in patients with hypereosinophilia. *Leukemia.* 2006;20:827-832.
57. Buijs A, Bruin M. Fusion of FIP1L1 and RARA as a result of a novel t(4;17)(q12;q21) in a case of juvenile myelomonocytic leukemia. *Leukemia.* 2007;21:1104-1108.
58. Ozawa T, Brennan CW, Wang L, et al. PDGFRA gene rearrangements are frequent genetic events in PDGFRA-amplified glioblastomas. *Genes Dev.* 2005;19:2205-2218.
59. Golub TR, Barker GF, Lovett M, Gilliland DG. Fusion of PDGF receptor beta to a novel ets-like gene, tel, in chronic myelomonocytic leukemia with t(5;12) chromosomal translocation. *Cell.* 1994;77:307-316.
60. Abe A, Emi N, Tanimoto M, Terasaki H, Marunouchi T, Saito H. Fusion of the platelet-derived growth factor receptor beta to a novel gene CEV14 in acute myelogenous leukemia after clonal evolution. *Blood.* 1997;90:4271-4277.
61. Magnusson MK, Meade KE, Brown KE, et al. Rabaptin-5 is a novel fusion partner to platelet-derived growth factor beta receptor in chronic myelomonocytic leukemia. *Blood.* 2001;98:2518-2525.
62. Kulkarni S, Heath C, Parker S, et al. Fusion of H4/D10S170 to the platelet-derived growth factor receptor beta in BCR-ABL-negative myeloproliferative disorders with a t(5;10)(q33;q21). *Cancer Res.* 2000;60:3592-3598.



63. Wilkinson K, Velloso ER, Lopes LF, et al. Cloning of the t(1;5)(q23;q33) in a myeloproliferative disorder associated with eosinophilia: involvement of PDGFRB and response to imatinib. *Blood*. 2003;102:4187-4190.
64. Grand FH, Burgstaller S, Kuhr T, et al. p53-Binding protein 1 is fused to the platelet-derived growth factor receptor beta in a patient with a t(5;15)(q33;q22) and an imatinib-responsive eosinophilic myeloproliferative disorder. *Cancer Res*. 2004;64:7216-7219.
65. Vizmanos JL, Novo FJ, Roman JP, et al. NIN, a gene encoding a CEP110-like centrosomal protein, is fused to PDGFRB in a patient with a t(5;14)(q33;q24) and an imatinib-responsive myeloproliferative disorder. *Cancer Res*. 2004;64:2673-2676.
66. Morerio C, Aquila M, Rosanda C, et al. HCMOGT-1 is a novel fusion partner to PDGFRB in juvenile myelomonocytic leukemia with t(5;17)(q33;p11.2). *Cancer Res*. 2004;64:2649-2651.
67. Ross TS, Bernard OA, Berger R, Gilliland DG. Fusion of Huntingtin interacting protein 1 to platelet-derived growth factor beta receptor (PDGFbetaR) in chronic myelomonocytic leukemia with t(5;7)(q33;q11.2). *Blood*. 1998;91:4419-4426.
68. Levine RL, Wadleigh M, Sternberg DW, et al. KIAA1509 is a novel PDGFRB fusion partner in imatinib-responsive myeloproliferative disease associated with a t(5;14)(q33;q32). *Leukemia*. 2005;19:27-30.
69. Rosati R, La Starza R, Luciano L, et al. TPM3/PDGFRB fusion transcript and its reciprocal in chronic eosinophilic leukemia. *Leukemia*. 2006;20:1623-1624.
70. La Starza R, Rosati R, Roti G, et al. A new NDE1/PDGFRB fusion transcript underlying chronic myelomonocytic leukaemia in Noonan Syndrome. *Leukemia*. 2007;21:830-833.
71. Walz C, Metzgeroth G, Haferlach C, et al. Characterization of three new imatinib-responsive fusion genes in chronic myeloproliferative disorders generated by disruption of the platelet-derived growth factor receptor beta gene. *Haematologica*. 2007;92:163-169.
72. Gallagher G, Horsman DE, Tsang P, Forrest DL. Fusion of PRKG2 and SPTBN1 to the platelet-derived growth factor receptor beta gene (PDGFRB) in imatinib-responsive atypical myeloproliferative disorders. *Cancer Genet Cytogenet*. 2008;181:46-51.
73. Walz C, Haferlach C, Hanel A, et al. Identification of a MYO18A-PDGFRB fusion gene in an eosinophilia-associated atypical myeloproliferative neoplasm with a t(5;17)(q33-34;q11.2). *Genes Chromosomes Cancer*. 2009;48:179-183.
74. Erben P, Gosenca D, Muller MC, et al. Screening for diverse PDGFRA or PDGFRB fusion genes is facilitated by generic quantitative reverse transcriptase polymerase chain reaction analysis. *Haematologica*;95:738-744.
75. Gorello P, La Starza R, Brandimarte L, et al. A PDGFRB-positive acute myeloid malignancy with a new t(5;12)(q33;p13.3) involving the ERC1 gene. *Leukemia*. 2008;22:216-218.
76. Hidalgo-Curtis C, Apperley JF, Stark A, et al. Fusion of PDGFRB to two distinct loci at 3p21 and a third at 12q13 in imatinib-responsive myeloproliferative neoplasms. *Br J Haematol*. 2010;148:268-273.
77. Medves S, Duhoux FP, Ferrant A, et al. KANK1, a candidate tumor suppressor gene, is fused to PDGFRB in an imatinib-responsive myeloid neoplasm with severe thrombocytopenia. *Leukemia*. 2010;24:1052-1055.
78. Santoro M, Melillo RM, Fusco A. RET/PTC activation in papillary thyroid carcinoma: European Journal of Endocrinology Prize Lecture. *Eur J Endocrinol*. 2006;155:645-653.
79. Rabes HM, Demidchik EP, Sidorow JD, et al. Pattern of radiation-induced RET and NTRK1 rearrangements in 191 post-chernobyl papillary thyroid carcinomas: biological, phenotypic, and clinical implications. *Clin Cancer Res*. 2000;6:1093-1103.
80. Ciampi R, Giordano TJ, Wikenheiser-Brokamp K, Koenig RJ, Nikiforov YE. HOOK3-RET: a novel type of RET/PTC rearrangement in papillary thyroid carcinoma. *Endocr Relat Cancer*. 2007;14:445-452.
81. Klugbauer S, Jauch A, Lengfelder E, Demidchik E, Rabes HM. A novel type of RET rearrangement (PTC8) in childhood papillary thyroid carcinomas and characterization of the involved gene (RFG8). *Cancer Res*. 2000;60:7028-7032.
82. Charest A, Kheifets V, Park J, et al. Oncogenic targeting of an activated tyrosine kinase to the Golgi apparatus in a glioblastoma. *Proc Natl Acad Sci U S A*. 2003;100:916-921.
83. Streubel B, Vinatzer U, Willheim M, Raderer M, Chott A. Novel t(5;9)(q33;q22) fuses ITK to SYK in unspecified peripheral T-cell lymphoma. *Leukemia*. 2006;20:313-318.

84. Kuno Y, Abe A, Emi N, et al. Constitutive kinase activation of the TEL-Syk fusion gene in myelodysplastic syndrome with t(9;12)(q22;p12). *Blood*. 2001;97:1050-1055.
85. Bongarzone I, Pierotti MA, Monzini N, et al. High frequency of activation of tyrosine kinase oncogenes in human papillary thyroid carcinoma. *Oncogene*. 1989;4:1457-1462.
86. Greco A, Miranda C, Pierotti MA. Rearrangements of NTRK1 gene in papillary thyroid carcinoma. *Mol Cell Endocrinol*;321:44-49.
87. Eguchi M, Eguchi-Ishimae M, Tojo A, et al. Fusion of ETV6 to neurotrophin-3 receptor TRKC in acute myeloid leukemia with t(12;15)(p13;q25). *Blood*. 1999;93:1355-1363.
